# Supplementary material for: Toxicokinetics of Ag (nano)materials in the soil model Enchytraeus crypticus (Oligochaeta) – impact of aging and concentration
Source: Royal Society of Chemistry journal article supplement (doi:10.1039/d1en00338k), 2021-01-01
Supplement: d1en00338k1.pdf [file d1en00338k1.pdf]

## Supplementary Information

### **Toxicokinetics of Ag (nano)materials in the soil model *Enchytraeus crypticus* (Oligochaeta) – impact of aging and concentration**

Fátima C.F. Santos<sup>1</sup>, Paula S. Tourinho<sup>1</sup>, Janeck J. Scott-Fordsmand<sup>2</sup>, Cornelis A.M. van Gestel<sup>3</sup> and Mónica J.B. Amorim<sup>1\*</sup>

<sup>1</sup>Department of Biology & CESAM, University of Aveiro, 3810-193 Aveiro, Portugal

<sup>2</sup>Department of Bioscience, Aarhus University, Silkeborg, Denmark

<sup>3</sup>Department of Ecological Science. Faculty of Science, Vrije Universiteit Amsterdam De Boelelaan 1085, 1081 HV Amsterdam, The Netherlands

\* corresponding author:

Mónica J.B. Amorim

Department of Biology & CESAM, University of Aveiro

Campus de Santiago, 3810-193 Aveiro, Portugal

E-mail: [mjamorim@ua.pt](mailto:mjamorim@ua.pt)

**Table S1:** Total and 0.01 M CaCl<sub>2</sub>-extractable concentrations measured at days 0, 1, and 14 (mean ± SE) of the bioaccumulation tests with *Enchytraeus crypticus* in LUFA 2.2 soil spiked with AgNO<sub>3</sub> and Ag NM300K. Also included are nominal concentrations of Ag, aging period, and pH (0.01 M CaCl<sub>2</sub>) at days 0 and 28. [% recovery]: % recovery compared to nominal Ag concentration. LOD: Limit of Detection for soil and for 0.01M CaCl<sub>2</sub>-extractable concentrations (0.003 mg Ag/kg soil DW).

| Ag                | Aging (days) | Nominal (mg Ag/kg soil DW) | pH    |        | Measured total (mg Ag/kg soil DW) [% recovery] |                  |                   | CaCl <sub>2</sub> -extractable (mg Ag/kg soil DW) |               |              |
|-------------------|--------------|----------------------------|-------|--------|------------------------------------------------|------------------|-------------------|---------------------------------------------------|---------------|--------------|
|                   |              |                            | day 0 | day 28 | day 0                                          | day 1            | day 14            | day 0                                             | day 1         | day 14       |
| AgNO <sub>3</sub> | 3            | 0                          | 5.3   | 5.7    | -                                              | <LOD             | <LOD              | -                                                 | <LOD          | <LOD         |
|                   | 3            | 5                          | 5.5   | 5.7    | -                                              | 4.1 ± 0.13 [83%] | 4.2 ± 0.18 [84%]  | -                                                 | 0.04 ± 0      | 0.005 ± 0    |
|                   | 3            | 45                         | 5.4   | 5.7    | 41.4 ± 2.9 [92%]                               | 33.8 ± 2.1 [75%] | 39.7 ± 0.36 [88%] | 0.13 ± 0.03                                       | 0.2 ± 0.02    | 0.08 ± 0.05  |
|                   | 14           | 0                          | 5.6   | 5.6    | 0.078 ± 0.08                                   | -                | 0.85 ± 0.8        | 0.003 ± 0.002                                     | -             | 0.01 ± 0.002 |
|                   | 14           | 5                          | 5.6   | 5.6    | 4.7 ± 0.22 [94%]                               | 4.5 ± 0.36 [91%] | 4.3 ± 0.12 [87%]  | 0.003 ± 0.002                                     | 0.005 ± 0     | 0.007 ± 0    |
|                   | 14           | 45                         | 5.6   | 5.6    | 37.9 ± 2.6 [84%]                               | 39.3 ± 0.8 [87%] | 35.4 ± 2.9 [79%]  | 0.10 ± 0.03                                       | 0.15 ± 0.02   | 0.02 ± 0.01  |
| NM300K            | 3            | 0                          | 5.9   | 5.8    | <LOD                                           | <LOD             | <LOD              | <LOD                                              | <LOD          | <LOD         |
|                   | 3            | 6                          | 5.7   | 5.8    | 4.4 ± 0.06 [74%]                               | 4.9 ± 0.3 [82%]  | 4.2 ± 0.3 [70%]   | <LOD                                              | 0.003 ± 0.002 | <LOD         |
|                   | 3            | 60                         | 5.6   | 5.8    | 55.5 ± 3.5 [92%]                               | 49.9 ± 3.4 [83%] | 44.9 [74%]        | 0.17 ± 0.03                                       | 0.11 ± 0.008  | 0.215 ± 0    |
|                   | 14           | 0                          | 5.9   | 5.8    | <LOD                                           | <LOD             | <LOD              | <LOD                                              | <LOD          | <LOD         |
|                   | 14           | 6                          | 5.9   | 5.8    | -                                              | 4.7 ± 0.38 [79%] | 4.5 ± 0.3 [75%]   | -                                                 | <LOD          | 0.005 ± 0.08 |
|                   | 14           | 60                         | 5.8   | 5.8    | 53.5 ± 4.02 [89%]                              | 49.4 ± 6.7 [82%] | 44.8 ± 1.6 [75%]  | 0.17 ± 0.04                                       | 0.2 ± 0.12    | 0.1 ± 0.03   |

**Table S2:** Summary of literature review of toxicokinetic studies with Silver (Ag) salts and Ag nanomaterials (NMs), in enchytraeids and earthworms exposed in different conditions.

| Species                      | Exposure time (days) | Test Soil                                          | Main soil characteristics                                                                                                                                         | Test Substance (nominal conc) (mg/kg soil DW) | Abiotic factors     | K <sub>a</sub> (kg soil/kg animal/day) | K <sub>e</sub> (per day) | C <sub>exp</sub> (mg /kg soil) |                   | Reference |
|------------------------------|----------------------|----------------------------------------------------|-------------------------------------------------------------------------------------------------------------------------------------------------------------------|-----------------------------------------------|---------------------|----------------------------------------|--------------------------|--------------------------------|-------------------|-----------|
|                              |                      |                                                    |                                                                                                                                                                   |                                               |                     |                                        |                          | Soil                           | CaCl <sub>2</sub> |           |
| <i>Enchytraeus crypticus</i> | 10                   | Quartz sand, pre-treated to obtain an inert matrix | pH=6.0; test medium: Ca (NO <sub>3</sub> ) <sub>2</sub> , MgSO <sub>4</sub> 7H <sub>2</sub> O, NaNO <sub>3</sub> , KNO <sub>3</sub> in deionized H <sub>2</sub> O | AgNP-PVP (1.56-50 mg/L)                       | 20±1°C              | 45.8±8.01                              | 0.071±0.069              | -                              | -                 | 1         |
|                              |                      |                                                    |                                                                                                                                                                   | AgNP-Cit (1.56-50 mg/L)                       |                     | 3.62±1.46                              | 0.231±0.151              | -                              | -                 |           |
|                              |                      |                                                    |                                                                                                                                                                   | AgNO <sub>3</sub> (0.5-16 mg/L)               |                     | 49.5±18.5                              | 0.259±0.190              | -                              | -                 |           |
| <i>Enchytraeus crypticus</i> | 20                   | LUFA 2.2                                           | pH=5.5; OC=3.5 %; CEC=9.7 cmolc/kg                                                                                                                                | 40 mg/kg Ag NPs                               | 20°C+ 75 % Humidity | 0.22                                   | 0.49                     | 39.5                           | -                 | 2         |
| <i>Eisenia fetida</i>        | 56                   | Uncontaminated soil;                               | pH=5.2; OM=5.4 %                                                                                                                                                  | Ag-NPs (15 mg/kg)                             | 20±1°C + 47% WHC    | 0.061 ± 0.019                          | 0.040 ± 0.013            | 9.0 ± 1.4                      | 40.5 ± 5.4        | 3         |
|                              |                      |                                                    |                                                                                                                                                                   | Ag <sub>2</sub> S-NPs (15 mg/kg)              |                     | 0.008 ± 0.002                          | 0.064 ± 0.020            | 3.7 ± 1.1                      | n.d.              |           |
|                              |                      |                                                    |                                                                                                                                                                   | AgNO <sub>3</sub> (15 mg/kg)                  |                     | 0.055 ± 0.007                          | 0.044 ± 0.018            | 9.3 ± 0.6                      | 37.9 ± 5.4        |           |
| <i>Eisenia andrei</i>        | 42                   | Soil amendment, no biosolids                       | pH=5.88<br>pH=6.76                                                                                                                                                | AgNO <sub>3</sub>                             | 20±3°C              | 0.22 (0.09–0.35)                       | 0.31 (0.09–0.52)         | 3.90±0.19                      | -                 | 4         |
|                              |                      |                                                    |                                                                                                                                                                   | Ag NPs (20 nm)                                |                     | 1.51 (0–4.69)                          | 1.54 (0–4.95)            | 1.09±0.17                      | -                 |           |
|                              |                      |                                                    |                                                                                                                                                                   | Ag NPs (40 nm)                                |                     | -                                      | -                        | 77.95±2.78                     | -                 |           |
| <i>Folsomia candida</i>      | 28                   | LUFA 2.2                                           | pH= 5.5; OC=2.09%; CEC=10.0 meq/100g; WHC=46.5%                                                                                                                   | AgNO <sub>3</sub> (30 mg/kg)                  | 20°C+ 50% WHC       | 0.177 (0.119–0.234)                    | 0.036 (0.003–0.69)       | 29.2 ± 3.11                    | 0.021 ± 0.002     | 5         |
|                              |                      |                                                    |                                                                                                                                                                   | AgNO <sub>3</sub> (60mg/kg)                   |                     | 0.090 (0.062–0.119)                    | 0.014 (0.014–0.42)       | 53.3 ± 1.47                    | 0.048 ± 0.004     |           |
|                              |                      |                                                    |                                                                                                                                                                   | Ag NPs                                        |                     | 0.106 (0.075–0.138)                    | 0.095 (0.051–0.138)      | 168 ± 3.02                     | 0.138             |           |
| <i>Lumbricus rubellus</i>    | 7                    | LUFA 2.2 loam sand                                 | pH=5.5±1.1; OC=2.1±0.4 w/w %; CEC=10±0.5 mEq 100 g <sup>-1</sup>                                                                                                  | 100 mg/kg Ag NPs                              | 12±1°C+ 45% WHC     | 0.002 (4x10 <sup>-4</sup> –0.004)      | 0.026 (0–0.055)          | 84.9±33.8                      | 0.03±0.01         | 6         |
|                              |                      |                                                    |                                                                                                                                                                   | 500 mg/kg Ag NPs                              |                     | 0.015 (0.002–0.033)                    | 0.160 (0–0.350)          | 431±115                        | 0.26±0.02         |           |
|                              |                      |                                                    |                                                                                                                                                                   | 20 mg/kg AgNO <sub>3</sub>                    |                     | 0.03 (0.02–0.04)                       | 0.031 (0.01–0.05)        | 23.5±2.48                      | 0.024±0.001       |           |
|                              |                      |                                                    |                                                                                                                                                                   | 100 mg/kg AgNO <sub>3</sub>                   |                     | 0.008 (0.004–0.011)                    | 0.022 (0.009–0.035)      | 101±4.42                       | 0.044±0.001       |           |
| <i>Lumbricus rubellus</i>    | 28                   | Field soil, Netherlands                            | pH=5.0; OM=4.3%                                                                                                                                                   | 1.5 Ag NPs (NM300K)                           | 1°C+ 61 %           | -                                      | -                        | 1.2±0.03                       | <3                | 7         |
|                              |                      |                                                    |                                                                                                                                                                   | 15.4 Ag NPs (NM300K)                          |                     | -                                      | -                        | 10.5±0.2                       | <3                |           |

|                         |    |          |                                             |                                   |         |                    |                   |            |           |   |
|-------------------------|----|----------|---------------------------------------------|-----------------------------------|---------|--------------------|-------------------|------------|-----------|---|
|                         |    |          |                                             | 154 Ag NPs (NM300K)               |         | -                  | -                 | 118±4      | 96±6      |   |
|                         |    |          |                                             | 15.4 mg/kg AgNO <sub>3</sub>      |         | -                  | -                 | 11.5±0.1   | 16±7      |   |
| <i>Tenebrio molitor</i> | 42 | LUFA 2.2 | pH=5.4;<br>OC=1.61%;<br>CEC=9.7<br>cmolc/kg | 100 mg Ag/kg AgNO <sub>3</sub>    | 20°C +  | 0.32 (0–0.635)     | 0.81 (0–1.99)     | 96.7±15.3  | 0.40±0.01 | 8 |
|                         |    |          |                                             | 100 mg Ag/kg Ag NPs 3–8 nm        | 40% WHC | 0.27 (0.042–0.491) | 1.00 (0.087–1.91) | 101±1.34   | 0.49±0.01 |   |
|                         |    |          |                                             | 100 mg/kg Ag NPs 50 nm            |         | 0.06 (0.009–0.115) | 0.12 (0–0.395)    | 80.4±2.83  | 0.38±0.02 |   |
|                         |    |          |                                             | 100 mg Ag/kg Ag NPs 60 nm         |         | 0.31 (0.048–0.572) | 1.09 (0.066–2.11) | 121±2.05   | 0.39±0.01 |   |
|                         |    |          |                                             | 22 mg Ag-kg Ag <sub>2</sub> S NPs |         | 1.89 (-)           | 12.6 (-)          | 22.0±0.424 | -         |   |
|                         |    |          |                                             | 22 mg Ag-kg Ag <sub>2</sub> S NPs |         | 0.13 (0–0.312)     | 1.35 (0–3.22)     | 227±3.61   | 0.001±0.0 |   |

## References

- 1 E. Topuz and C. A. M. van Gestel, *Environ. Toxicol. Chem.*, 2015, **34**, 2816–2823.
- 2 M. C. P. Mendonça, M. B. de Jesus and C. A. M. van Gestel, *Sci. Total Environ.*, 2020, **715**, 136797.
- 3 M. Baccaro, A. K. Undas, J. De Vriendt, J. H. J. Van Den Berg, R. J. B. Peters and N. W. Van Den Brink, *Environ. Sci. Nano*, 2018, **5**, 1107–1116.
- 4 J. R. Velicogna, D. M. Schwertfeger, A. H. Jesmer, R. P. Scroggins and J. I. Princz, *NanoImpact*, 2017, **6**, 11–18.
- 5 P. L. Waalewijn-Kool, K. Klein, R. M. Forniés and C. A. M. van Gestel, *Ecotoxicology*, 2014, **23**, 1629–1637.
- 6 M. Diez-Ortiz, E. Lahive, P. Kille, K. Powell, A. J. Morgan, K. Jurkschat, C. A. M. Van Gestel, J. F. W. Mosselmans, C. Svendsen and D. J. Spurgeon, *Environ. Toxicol. Chem.*, 2015, **34**, 2263–2270.
- 7 M. J. C. van der Ploeg, R. D. Handy, P. L. Waalewijn-Kool, J. H. J. van den Berg, Z. E. Herrera Rivera, J. Bovenschen, B. Molleman, J. M. Baveco, P. Tromp, R. J. B. Peters, G. F. Koopmans, I. M. C. M. Rietjens and N. W. van den Brink, *Environ. Toxicol. Chem.*, 2014, **33**, 743–752.
- 8 Z. Khodaparast, C. A. M. van Gestel, A. G. Papadiamantis, S. F. Gonçalves, I. Lynch and S. Loureiro, *Sci. Total Environ.*, 2021, **777**, 146071.
